# Supplementary material for: Multiple sodium channel isoforms mediate the pathological effects of Pacific ciguatoxin-1
Source: PubMed Central journal article supplement (PMC5320492; doi:10.1038/srep42810), 2017-02-22
Supplement: srep42810-s1.pdf [file srep42810-s1.pdf]

Supplementary information

## **Multiple sodium channel isoforms mediate the pathological effects of Pacific ciguatoxin-1**

Marco C. Inserra<sup>1,#</sup>, Mathilde R. Israel<sup>1,#</sup>, Ashlee Caldwell<sup>2,3,#</sup>, Joel Castro<sup>2,3,#</sup>, Jennifer R. Deuis<sup>1,#</sup>, Andrea M. Harrington<sup>2,3</sup>, Angelo Keramidas<sup>4</sup>, Sonia Garcia-Caraballo<sup>2,3</sup>, Jessica Maddern<sup>2,3</sup>, Andelain Erickson<sup>2,3</sup>, Luke Grundy<sup>2,3</sup>, Grigori Y. Rychkov<sup>3</sup>, Katharina Zimmermann<sup>5</sup>, Richard J. Lewis<sup>1</sup>, Stuart M. Brierley<sup>2,3,\*</sup>, Irina Vetter<sup>1,6\*</sup>

# contributed equally to this work

\* corresponding authors

stuart.brierley@flinders.edu.au

i.vetter@uq.edu.au

**Running title:** (40 characters) Ciguatoxin Na<sup>+</sup> channel subtype-selectivity

**Keywords:** (5) Ciguatoxin/Visceral/Pain/Sodium channel/Selectivity/ciguatera

<sup>1</sup> Centre for Pain Research, Institute for Molecular Bioscience, The University of Queensland, 306 Carmody Rd, St Lucia, Queensland 4072, Australia.

<sup>2</sup> Visceral Pain Group, South Australian Health and Medical Research Institute (SAHMRI), School of Medicine, Flinders University, Adelaide, South Australia 5000, Australia.

<sup>3</sup> Centre for Nutrition and Gastrointestinal Diseases, Discipline of Medicine, University of Adelaide, South Australian Health and Medical Research Institute (SAHMRI), North Terrace, Adelaide, South Australia 5000, Australia.

<sup>4</sup> Queensland Brain Institute, The University of Queensland, St Lucia, Queensland 4072, Australia.

<sup>5</sup> Klinik für Anästhesiologie am Universitätsklinikum Erlangen, Friedrich-Alexander Universität Erlangen-Nürnberg, Erlangen, Germany.

<sup>6</sup>School of Pharmacy, The University of Queensland, 20 Cornwall St, Woolloongabba, Queensland 4102, Australia.

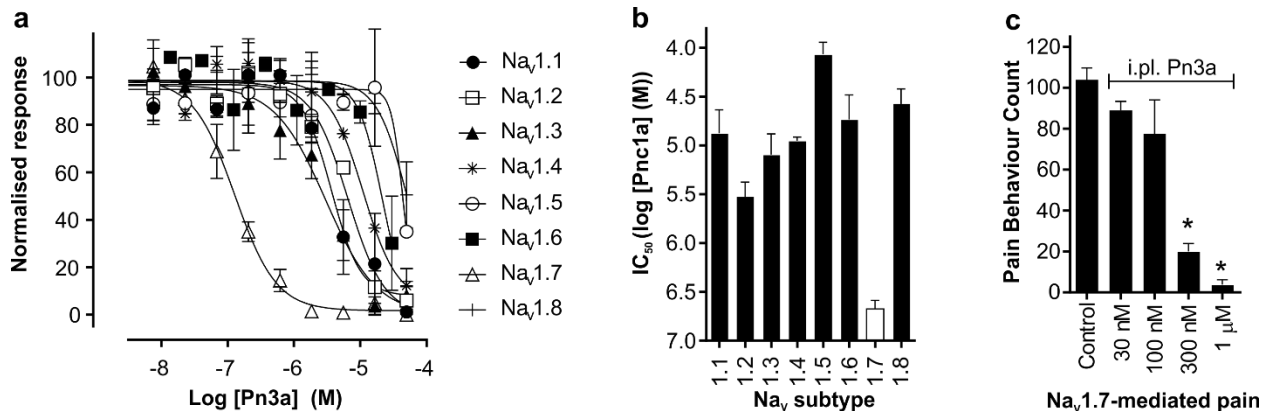

**Supplementary Figure 1.** *In vitro* and *in vivo* activity of the Nav1.7-selective inhibitor Pn3a. Nav subtype-selectivity of Pn3a was assessed using a high-throughput FLIPR<sup>Tetra</sup> membrane potential assay in HEK293 cells heterologously expressing hNav1.1 – hNav1.8. (a) Representative concentration-response curve illustrating full inhibition of Nav1.7-mediated responses at concentrations >300 nM that do not affect any other Nav subtype substantially. *n* = 3 wells/concentration (b) IC<sub>50</sub> (expressed as  $-\log$  [concentration] (M), or pIC<sub>50</sub>) values of Pn3a at hNav1.1 – hNav1.8. *n* = 3-5 independent experiments (c) To assess *in vivo* on-target effects of Pn3a, effects on pain behaviours after intraplantar injection of the selective Nav1.7 activator OD1 (300 nM) were assessed as previously described (Deuis, Wingerd et al., 2016). Intraplantar administration of Pn3a (30 nM – 1 μM, 40 μl) significantly (*P*<0.05) reverses Nav1.7-mediated pain behaviours. *n* = 3-12 animals/group. Data is presented as mean ± SEM. Statistical significance (\*, defined as *P*<0.05) was determined using One-way ANOVA.
